# Supplementary material for: Non-pharmacological interventions for the prevention of type 2 diabetes in low-income and middle-income countries: a systematic review of randomised controlled trials
Source: HighWire-hosted journal article supplement (doi:10.1136/bmjopen-2022-062671), 2022-06-01
Supplement: bmjopen-2022-062671supp001_data_supplement.pdf [file bmjopen-2022-062671supp001_data_supplement.pdf]

Supplementary Table 1: Comprehensive search strategy

| SI No | Search Queries                                                                                                                                                                                                                                                                                                                                                                                                                                                                                                                                                                                                                                                                                                                                                                                                                                                                                                                                                                                                                                                                                                                                                                                                                                                                                                                                                                                                                                                                                                                                                                                                                                   |
|-------|--------------------------------------------------------------------------------------------------------------------------------------------------------------------------------------------------------------------------------------------------------------------------------------------------------------------------------------------------------------------------------------------------------------------------------------------------------------------------------------------------------------------------------------------------------------------------------------------------------------------------------------------------------------------------------------------------------------------------------------------------------------------------------------------------------------------------------------------------------------------------------------------------------------------------------------------------------------------------------------------------------------------------------------------------------------------------------------------------------------------------------------------------------------------------------------------------------------------------------------------------------------------------------------------------------------------------------------------------------------------------------------------------------------------------------------------------------------------------------------------------------------------------------------------------------------------------------------------------------------------------------------------------|
| 1.    | (((((LMICs) OR ("developing countries"[MeSH Terms] OR "developing countries"[All Fields] OR "developing country"[All Fields])) OR (Urban)) OR (Rural))) OR (Peri-Urban)                                                                                                                                                                                                                                                                                                                                                                                                                                                                                                                                                                                                                                                                                                                                                                                                                                                                                                                                                                                                                                                                                                                                                                                                                                                                                                                                                                                                                                                                          |
| 2.    | ((((((((((Exercise[MeSH Terms])) OR (physical exercise[MeSH Terms])) OR (physical exercises[MeSH Terms])) OR (physical activities[MeSH Terms])) OR (physical activity[MeSH Terms]) ) OR (Exercise)) OR (Physical Exercise)) OR (Physical Activities)                                                                                                                                                                                                                                                                                                                                                                                                                                                                                                                                                                                                                                                                                                                                                                                                                                                                                                                                                                                                                                                                                                                                                                                                                                                                                                                                                                                             |
| 3.    | ((((((("nutritional support"[MeSH Terms] OR "nutritional support"[All Fields]) OR "nutritional therapy"[All Fields]) OR "nutrition therapy"[MeSH Terms]) OR "nutrition therapy"[All Fields])                                                                                                                                                                                                                                                                                                                                                                                                                                                                                                                                                                                                                                                                                                                                                                                                                                                                                                                                                                                                                                                                                                                                                                                                                                                                                                                                                                                                                                                     |
| 4.    | ((((Meal Plan) OR "meals"[MeSH Terms] OR "meals"[All Fields]) OR "meal"[All Fields]) AND "Plan"[All Fields])                                                                                                                                                                                                                                                                                                                                                                                                                                                                                                                                                                                                                                                                                                                                                                                                                                                                                                                                                                                                                                                                                                                                                                                                                                                                                                                                                                                                                                                                                                                                     |
| 5.    | ((("weight loss"[MeSH Terms] OR "weight loss/analysis"[MeSH Terms] OR "weight loss/diet therapy"[MeSH Terms] OR "weight loss/epidemiology"[MeSH Terms] OR "weight loss/metabolism"[MeSH Terms] OR "weight loss/statistics and numerical data"[MeSH Terms]) OR (weight reduction[MeSH Terms])) OR (body weight change[MeSH Terms]) OR (body weight changes[MeSH Terms])                                                                                                                                                                                                                                                                                                                                                                                                                                                                                                                                                                                                                                                                                                                                                                                                                                                                                                                                                                                                                                                                                                                                                                                                                                                                           |
| 6.    | (((((((((lifestyle[MeSH Terms]) OR (lifestyle risk reduction[MeSH Terms])) OR (sedentary lifestyle[MeSH Terms])) OR (life style[MeSH Terms])) OR ("life style/epidemiology"[MeSH Terms] OR "life style/analysis"[MeSH Terms])) OR (Lifestyle changes))) OR (lifestyle modifications) OR "life style"[All Fields]) OR "lifestyle"[All Fields]) OR ("Lifestyle Interventions"[All Fields])                                                                                                                                                                                                                                                                                                                                                                                                                                                                                                                                                                                                                                                                                                                                                                                                                                                                                                                                                                                                                                                                                                                                                                                                                                                         |
| 7.    | ((("diabetes mellitus"[MeSH Terms] OR "diabetes mellitus, type 2"[MeSH Terms]) OR ("diabetes mellitus, type 2/analysis"[MeSH Terms] OR "diabetes mellitus, type 2/blood"[MeSH Terms] OR "diabetes mellitus, type 2/classification"[MeSH Terms] OR "diabetes mellitus, type 2/complications"[MeSH Terms] OR "diabetes mellitus, type 2/diagnosis"[MeSH Terms] OR "diabetes mellitus, type 2/diet therapy"[MeSH Terms] OR "diabetes mellitus, type 2/drug therapy"[MeSH Terms] OR "diabetes mellitus, type 2/epidemiology"[MeSH Terms] OR "diabetes mellitus, type 2/ethnology"[MeSH Terms] OR "diabetes mellitus, type 2/etiology"[MeSH Terms] OR "diabetes mellitus, type 2/history"[MeSH Terms] OR "diabetes mellitus, type 2/physiopathology"[MeSH Terms] OR "diabetes mellitus, type 2/prevention and control"[MeSH Terms] OR "diabetes mellitus, type 2/statistics and numerical data"[MeSH Terms] OR "diabetes mellitus, type 2/therapy"[MeSH Terms] OR "diabetes mellitus/analysis"[MeSH Terms])) OR ("diabetes mellitus/classification"[MeSH Terms] OR "diabetes mellitus/complications"[MeSH Terms] OR "diabetes mellitus/diagnosis"[MeSH Terms] OR "diabetes mellitus/diet therapy"[MeSH Terms] OR "diabetes mellitus/drug therapy"[MeSH Terms] OR "diabetes mellitus/epidemiology"[MeSH Terms] OR "diabetes mellitus/prevention and control"[MeSH Terms] OR "diabetic cardiomyopathies/metabolism"[MeSH Terms])) OR (("diabetes"[All Fields] AND "mellitus"[All Fields])) OR "diabetes mellitus"[All Fields] OR "diabetic"[All Fields] OR "diabetics"[All Fields] OR "diabetes"[All Fields] OR "T2DM"[All Fields] OR "DM"[All Fields]) |

|            |                                                                                                                                                                                                                                                                                                                                                                                                                                                                                                                                                                                                                                                                             |
|------------|-----------------------------------------------------------------------------------------------------------------------------------------------------------------------------------------------------------------------------------------------------------------------------------------------------------------------------------------------------------------------------------------------------------------------------------------------------------------------------------------------------------------------------------------------------------------------------------------------------------------------------------------------------------------------------|
| <b>8.</b>  | "random allocation"[MeSH Terms] OR ("random"[All Fields] AND "allocation"[All Fields]) OR "random allocation"[All Fields] OR "random"[All Fields] OR "randomization"[All Fields] OR "randomized"[All Fields] OR "randomisation"[All Fields] OR "randomisations"[All Fields] OR "randomise"[All Fields] OR "randomised"[All Fields] OR "randomising"[All Fields] OR "randomizations"[All Fields] OR "randomize"[All Fields] OR "randomizes"[All Fields] OR "randomizing"[All Fields] OR "randomness"[All Fields] OR "randoms"[All Fields] OR "clinical trials as topic"[MeSH Terms] OR "clinical trials as topic"[All Fields] OR "trial"[All Fields] OR "trials"[All Fields] |
| <b>9.</b>  | ((clinical trials, randomized [MeSH Terms]) OR (controlled clinical trials, randomized [MeSH Terms])) OR (randomization [MeSH Terms]) OR "RCT"[All Fields] OR "RCTs"[All Fields]                                                                                                                                                                                                                                                                                                                                                                                                                                                                                            |
| <b>10.</b> | 1 AND 2 AND 3 AND 4 AND 5 AND 6 AND 7 AND 8 AND 9                                                                                                                                                                                                                                                                                                                                                                                                                                                                                                                                                                                                                           |
| <b>11.</b> | Filters applied: Clinical Trial, Randomized Controlled Trial, Humans.                                                                                                                                                                                                                                                                                                                                                                                                                                                                                                                                                                                                       |
