# Supplementary material for: Non-pharmacological interventions for the prevention of type 2 diabetes in low-income and middle-income countries: a systematic review of randomised controlled trials
Source: HighWire-hosted journal article supplement (doi:10.1136/bmjopen-2022-062671), 2022-06-01
Supplement: bmjopen-2022-062671supp002_data_supplement.pdf [file bmjopen-2022-062671supp002_data_supplement.pdf]

**Supplementary Table 2:** List of excluded articles

| <b>Serial no.</b> | <b>Author</b>                              | <b>Exclusion Criteria</b>                                     |
|-------------------|--------------------------------------------|---------------------------------------------------------------|
| 1                 | J.A. Dunbar et al                          | Outside LMIC                                                  |
| 2                 | Gang Hu et al                              | Population: GDM                                               |
| 3                 | Elroy J. Aguiar et al                      | Outside LMIC                                                  |
| 4                 | Jessica E. Bourne et al                    | Outside LMIC                                                  |
| 5                 | Yoshimi Fukuoka et al                      | Outside LMIC                                                  |
| 6                 | J. Genz et al                              | Outside LMIC                                                  |
| 7                 | Diabetes Prevention Program Research Group | Primary outcome: cost effectiveness                           |
| 8                 | Jeffrey A. Katula et al                    | Outside LMIC                                                  |
| 9                 | SoJung Lee et al                           | Outside LMIC, Population: age group 12-18years                |
| 10                | Vegard Nilsen et al                        | Outside LMIC                                                  |
| 11                | Matthew J. O'Brien et al                   | Outside LMIC                                                  |
| 12                | Matthew J. O'Brien et al                   | Outside LMIC                                                  |
| 13                | V Ponzio et al                             | Outside LMIC                                                  |
| 14                | Ayman Bani Salameh et al                   | Population: age group 12-18y                                  |
| 15                | Roberto P. Treviño et al                   | Outside LMIC, Population: 4th Grade children                  |
| 16                | Jaakko Tuomilehto et al                    | Outside LMIC                                                  |
| 17                | Katya Vargas-Ortiz et al                   | Control and Intervention both received Metformin              |
| 18                | Peter Wein et al                           | Outside LMIC, Population: GDM                                 |
| 19                | Sara Engel et al                           | Outside LMIC                                                  |
| 20                | Da Qing et al                              | Used older (WHO) criteria to define IGT and diabetes patients |

GDM- Gestational Diabetes Mellitus, LMIC- Low- and middle- income- countries
